# Supplementary material for: Relative sky radiance from multi-exposure all-sky camera images
Source: Copernicus journal article supplement (doi:10.5194/amt-14-2201-2021), 2021-03-22
Supplement: Supplementary file 1 [file amt-14-2201-2021-supplement.zip]

Archive with 3 entries (3 files):
- amt-14-2201-2021-supplement-title-page.pdf
- FigureS1caption.pdf
- FigureS1.png
