# Supplementary material for: Relative sky radiance from multi-exposure all-sky camera images
Source: Copernicus journal article supplement (doi:10.5194/amt-14-2201-2021), 2021-03-22
Supplement: Supplementary file 1 [file amt-14-2201-2021-supplement.zip › amt-14-2201-2021-supplement-title-page.pdf]

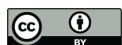

## *Supplement of*

# **Relative sky radiance from multi-exposure all-sky camera images**

**Juan C. Antuña-Sánchez et al.**

*Correspondence to:* Juan Carlos Antuña-Sánchez ([jcantuna@goa.uva.es](mailto:jcantuna@goa.uva.es))

- [amt-14-2201-2021-supplement-title-page.pdf](#)
- [FigureS1.png](#)
- [FigureS1caption.pdf](#)

The copyright of individual parts of the supplement might differ from the article licence.
