# Supplementary material for: Relative sky radiance from multi-exposure all-sky camera images
Source: Copernicus journal article supplement (doi:10.5194/amt-14-2201-2021), 2021-03-22
Supplement: Supplementary file 1 [file amt-14-2201-2021-supplement.zip › FigureS1caption.pdf]

**Figure S1: Corrected pixel signal at different exposure times as a function of the corrected pixel signal at other exposure times for all available daytime images on 17 August 2019 at Valladolid. Saturated pixels are not included. The panels show the weighted least square linear fit and the number of data (N).**
