# Supplementary figures and images for: Relative sky radiance from multi-exposure all-sky camera images
Source: Copernicus journal article supplement (doi:10.5194/amt-14-2201-2021), 2021-03-22

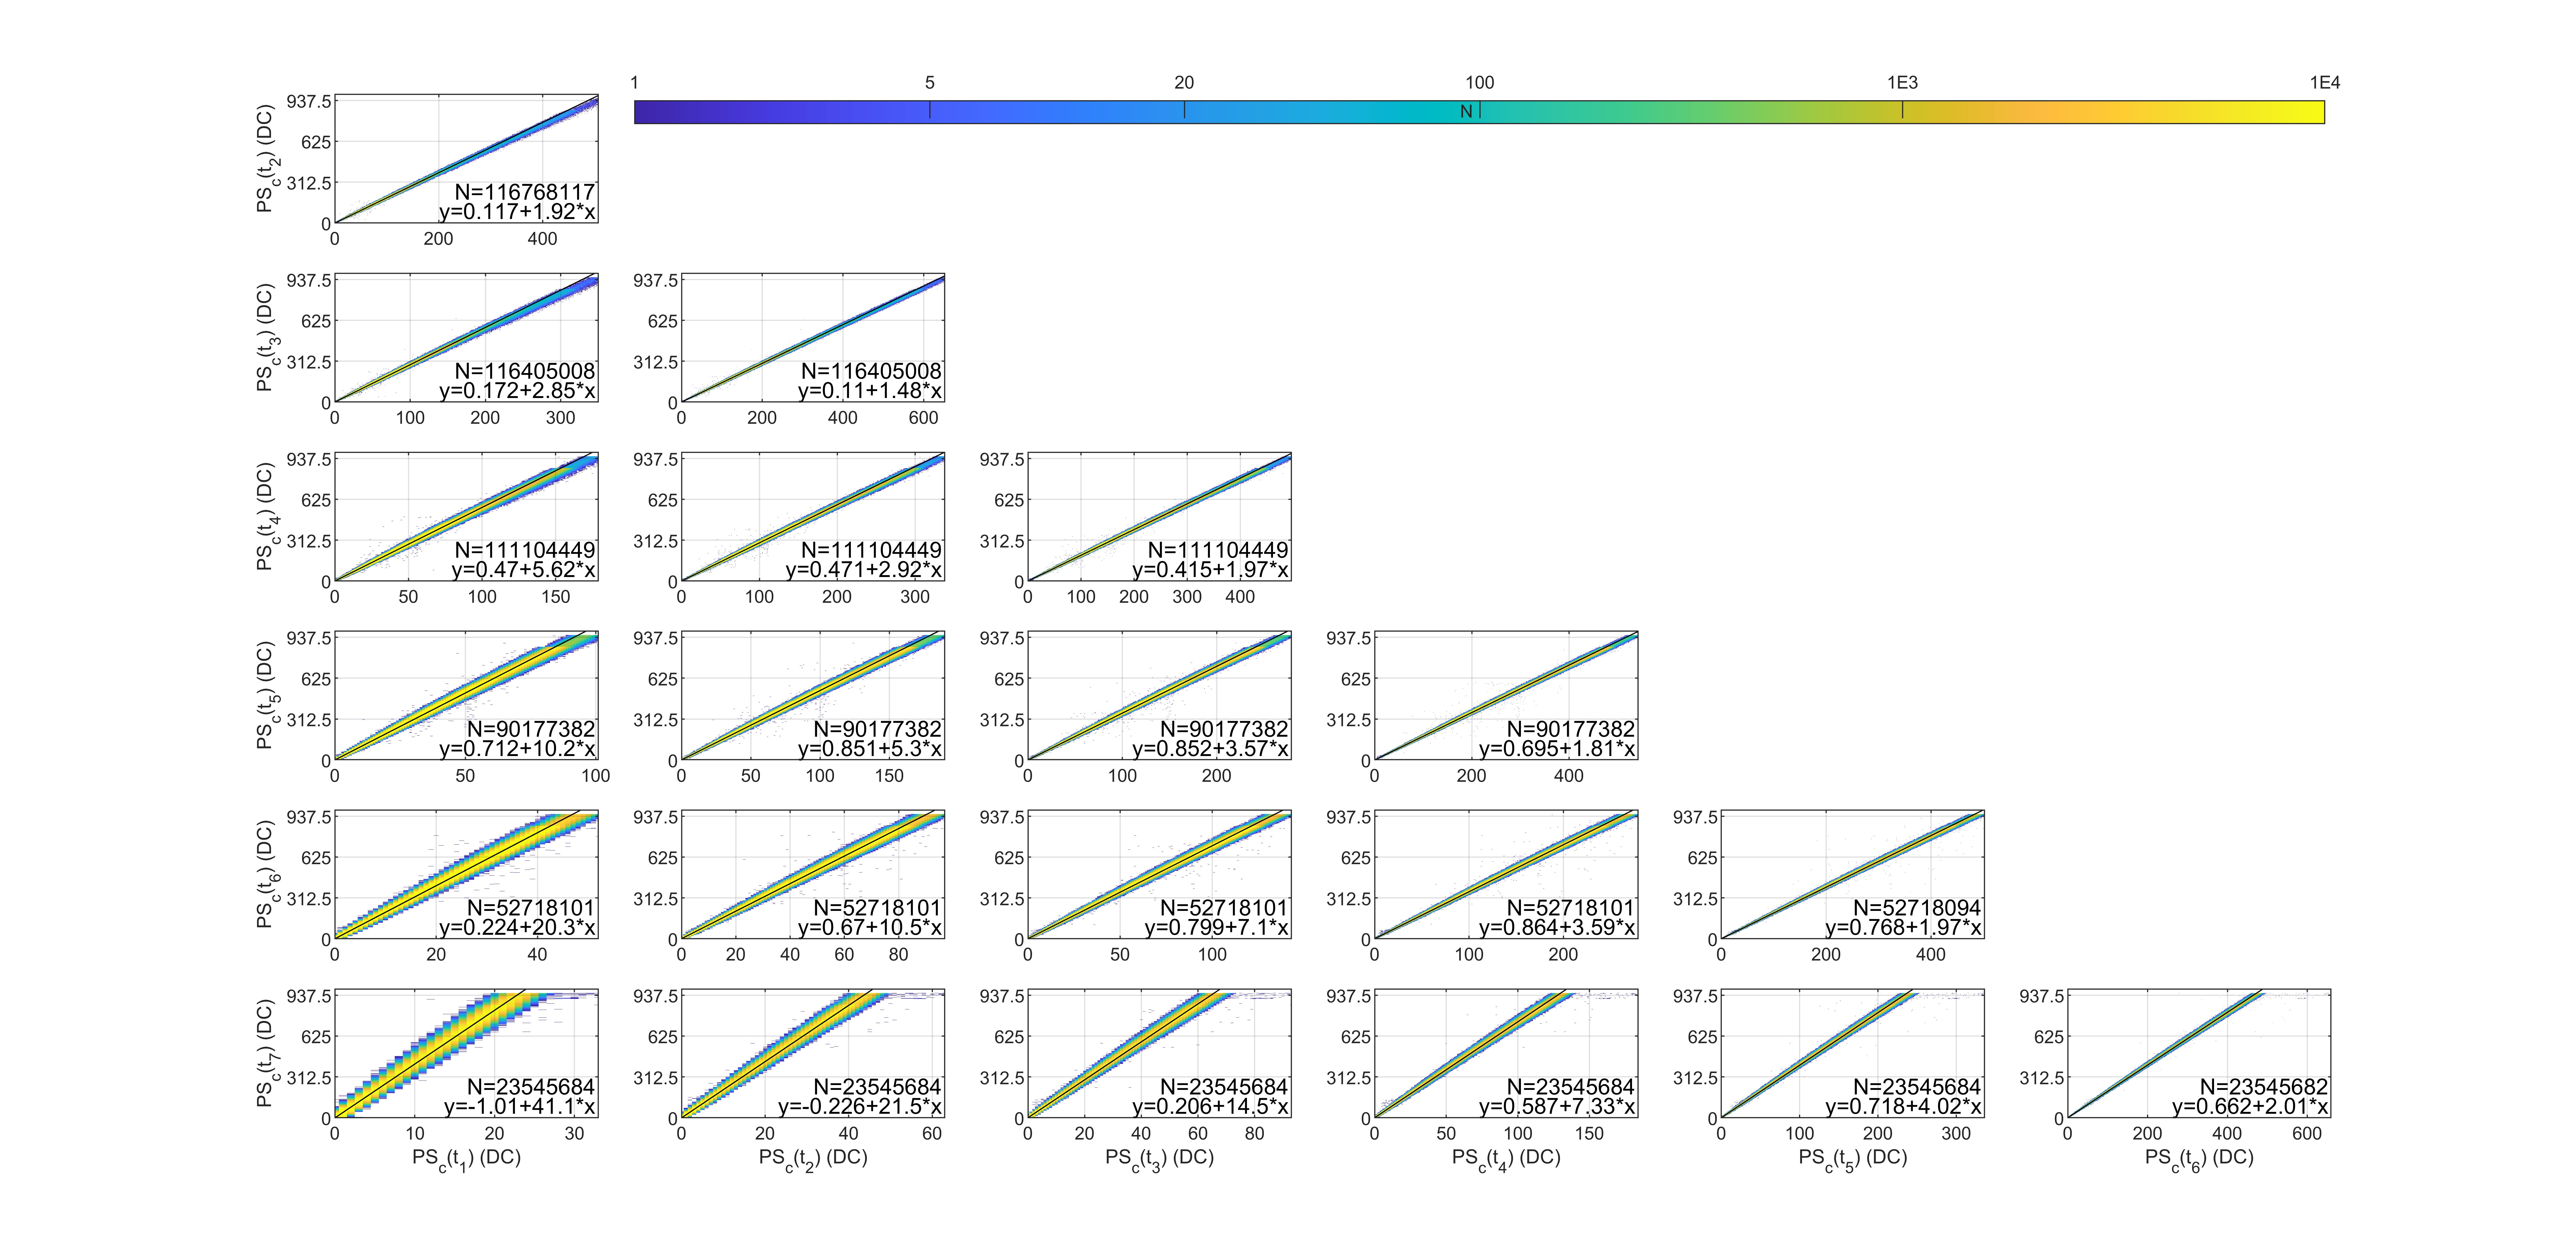

Supplement: Supplementary file 1 [file amt-14-2201-2021-supplement.zip › FigureS1.png]
